# Supplementary material for: PRIMAP-crf: UNFCCC CRF data in IPCC 2006 categories
Source: Copernicus journal article supplement (doi:10.5194/essd-10-1427-2018), 2018-08-09
Supplement: Supplementary file [file essd-10-1427-2018-supplement-title-page.pdf › essd-10-1427-2018-supplement-title-page.pdf]

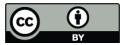

## *Supplement of*

# **PRIMAP-crf: UNFCCC CRF data in IPCC 2006 categories**

**M. Louise Jeffery et al.**

*Correspondence to:* M. Louise Jeffery ([louise.jeffery@pik-potsdam.de](mailto:louise.jeffery@pik-potsdam.de))

- [essd-10-1427-2018-supplement-title-page.pdf](#)
- [Jeffery-et-al-ESSD-2018-3-Supplementary-Material](#)
  - .DS\_Store
  - CRF\_tables\_key\_IPCC2006.csv
  - CRF\_tables\_key\_IPCC2006.xlsx
  - PRIMAP-crf-data-discrepancy-details.csv
  - PRIMAP-crf\_figure\_codes\_and\_data
    - \* AFOLU\_category\_tree\_plot.html
    - \* CRF17\_AFOLU\_categories.json
    - \* CRF17\_categories.json
    - \* CRF\_fig1\_treeplot\_all\_categories.html
  - PRIMAP\_EMOD\_GWPs.csv
  - PRIMAP\_EMOD\_GWPs.xls
  - PRIMAPcrf-IPCC2006-category-codes.csv
  - PRIMAPcrf\_2018v1.0\_categories.json

The copyright of individual parts of the supplement might differ from the CC BY 4.0 License.
